# Supplementary material for: Facile fabrication of a magnetically induced structurally colored fiber and its strain-responsive properties
Source: Royal Society of Chemistry journal article supplement (doi:10.1039/c5ta00775e), 2015-01-01
Supplement: c5ta00775e1.pdf [file c5ta00775e1.pdf]

Electronic Supplementary Material (ESI) for Journal of Materials Chemistry A.  
This journal is © The Royal Society of Chemistry 2015

[Electronic Supplementary Information]

**Facile fabrication of a magnetic induced structurally colored  
fiber and its strain-responsive properties**

Shenglong Shang,<sup>a</sup> Zhifu Liu,<sup>b</sup> Qinghong Zhang,<sup>a</sup> Hongzhi Wang<sup>\*a</sup> and Yaogang Li<sup>\*c</sup>

<sup>a</sup> State Key Laboratory for Modification of Chemical Fibers and Polymer Materials, College of Materials Science and Engineering, Donghua University, Shanghai 201620, China.

<sup>b</sup> School of Materials Science and Engineering, Shanghai Institute of Technology, Shanghai 201418, China.

<sup>c</sup> Engineering Research Centre of Advanced Glasses Manufacturing Technology, MOE, College of Materials Science and Engineering, Donghua University, Shanghai 201620, China.

\*E-mail: wanghz@dhu.edu.cn; yaogang\_li@dhu.edu.cn

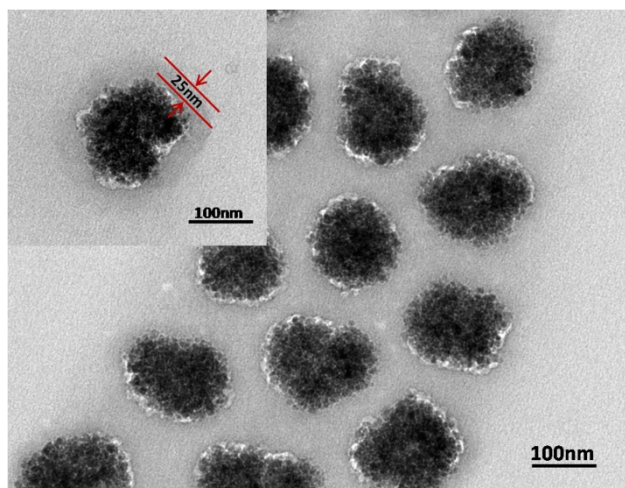

**Fig. S1** Representative TEM images of the uniform  $\text{Fe}_3\text{O}_4@\text{C}$  SCNCs.

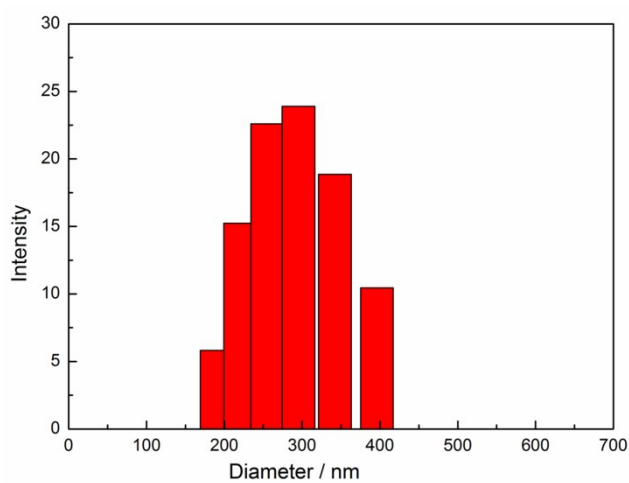

**Fig. S2** Size distribution of  $\text{Fe}_3\text{O}_4@\text{C}$  SCNCs.

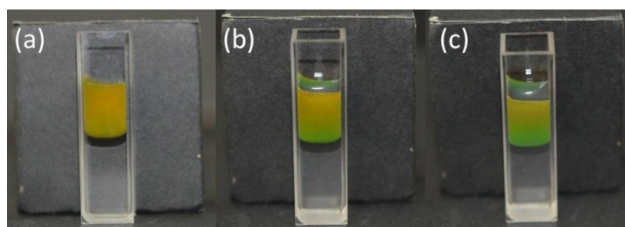

**Fig. S3** Digital photos of the  $\text{Fe}_3\text{O}_4@\text{C}$  SCNCs in ethylene glycol and their angle-independence, (a)  $90^\circ$ , (b)  $80^\circ$ , (c)  $70^\circ$ .
